# Supplementary material for: IFITM3-mediated activation of TRAF6/MAPK/AP-1 pathways induces acquired TKI resistance in clear cell renal cell carcinoma
Source: PubMed Central journal article supplement — Investig Clin Urol. 2023 Dec 28;65(1):84–93. doi: 10.4111/icu.20230294 (PMC10789540; doi:10.4111/icu.20230294), 2023-12-28
Supplement: icu-65-84-s001.pdf [file icu-65-84-s001.pdf]

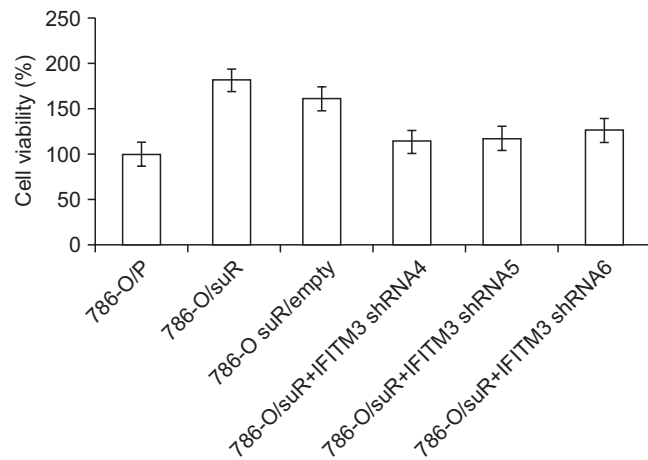

| Gene                            | shRNA sequence                     |
|---------------------------------|------------------------------------|
| IFITM3<br>pLKO.1-CMV-Neo vector | shRNA4 5'-CCTCATGACCATTCTGCTCAT-3' |
|                                 | shRNA5 5'-GCTTCATAGCATTGCGCTACT-3' |
|                                 | shRNA6 5'-CCTGAACATCTGGGCCCTGAT-3' |

**Supplementary Fig. 1.** Interferon-induced transmembrane protein 3 (IFITM3) shRNA sequence. Among the three candidate sequences, the shRNA4 showed the best performance and was used for further experiments.
