# Supplementary material for: IFITM3-mediated activation of TRAF6/MAPK/AP-1 pathways induces acquired TKI resistance in clear cell renal cell carcinoma
Source: PubMed Central journal article supplement — Investig Clin Urol. 2023 Dec 28;65(1):84–93. doi: 10.4111/icu.20230294 (PMC10789540; doi:10.4111/icu.20230294), 2023-12-28
Supplement: icu-65-84-s002.pdf [file icu-65-84-s002.pdf]

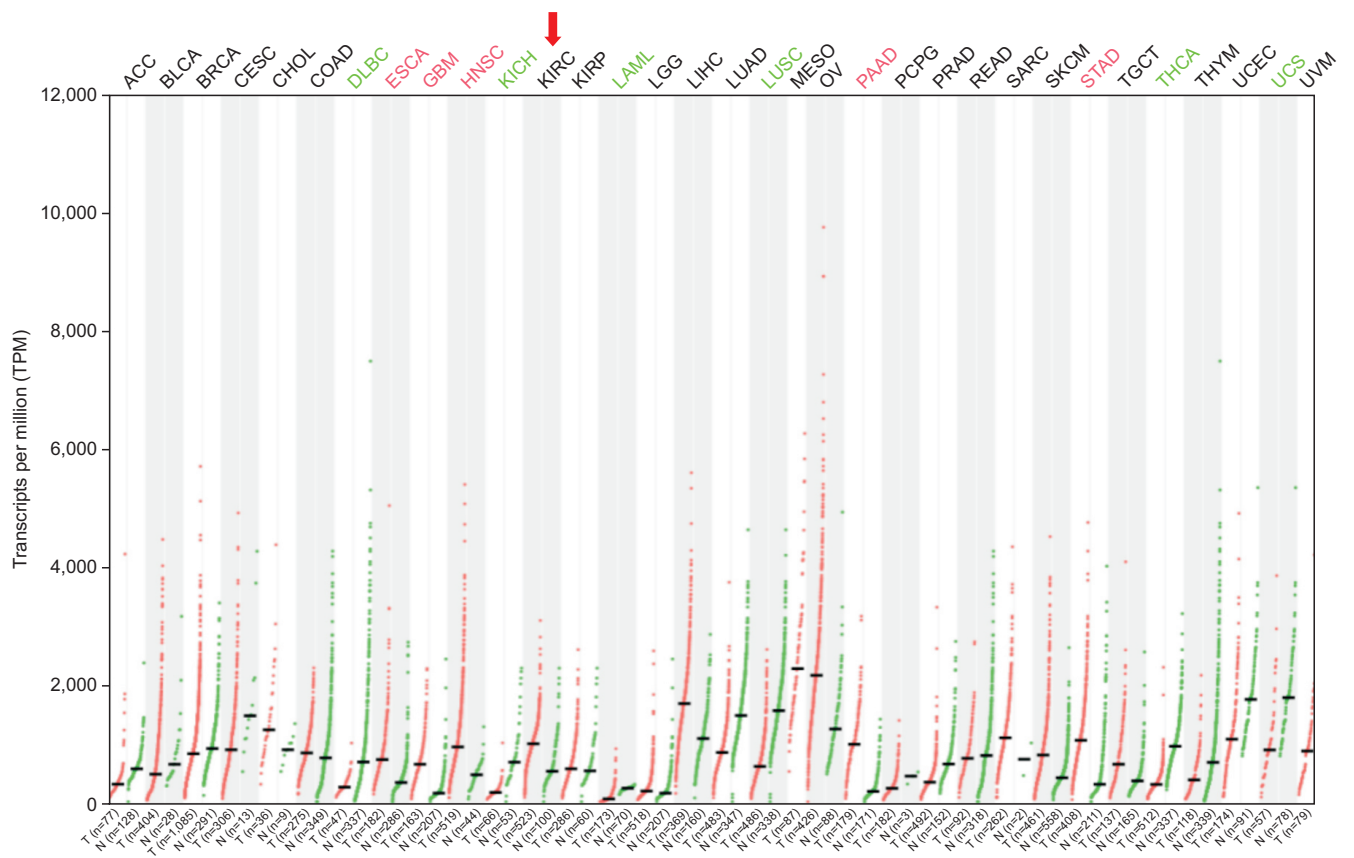

**Supplementary Fig. 2.** Increased expression of IFITM3 (interferon-induced transmembrane protein 3) in renal cell carcinoma (RCC) compared to the normal kidney in a public database GEPIA.
