# Supplementary material for: IFITM3-mediated activation of TRAF6/MAPK/AP-1 pathways induces acquired TKI resistance in clear cell renal cell carcinoma
Source: PubMed Central journal article supplement — Investig Clin Urol. 2023 Dec 28;65(1):84–93. doi: 10.4111/icu.20230294 (PMC10789540; doi:10.4111/icu.20230294), 2023-12-28
Supplement: icu-65-84-s003.pdf [file icu-65-84-s003.pdf]

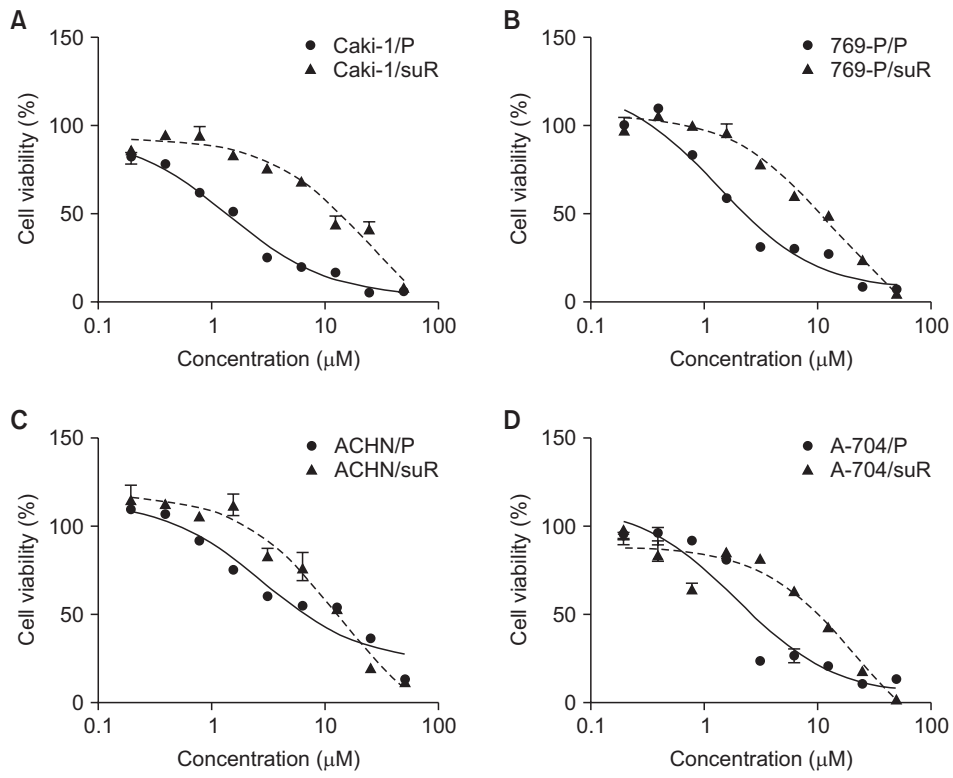

**Supplementary Fig. 3.** The sunitinib-resistant renal cell carcinoma cell lines including Caki-1 (A), 769-P (B), ACHN (C), and A-704 (D) showed higher cell viability at various concentrations of sunitinib compared to the parental cell lines, confirming their tyrosine kinase inhibitor (TKI) resistance.
