# Supplementary material for: IFITM3-mediated activation of TRAF6/MAPK/AP-1 pathways induces acquired TKI resistance in clear cell renal cell carcinoma
Source: PubMed Central journal article supplement — Investig Clin Urol. 2023 Dec 28;65(1):84–93. doi: 10.4111/icu.20230294 (PMC10789540; doi:10.4111/icu.20230294), 2023-12-28
Supplement: icu-65-84-s004.pdf [file icu-65-84-s004.pdf]

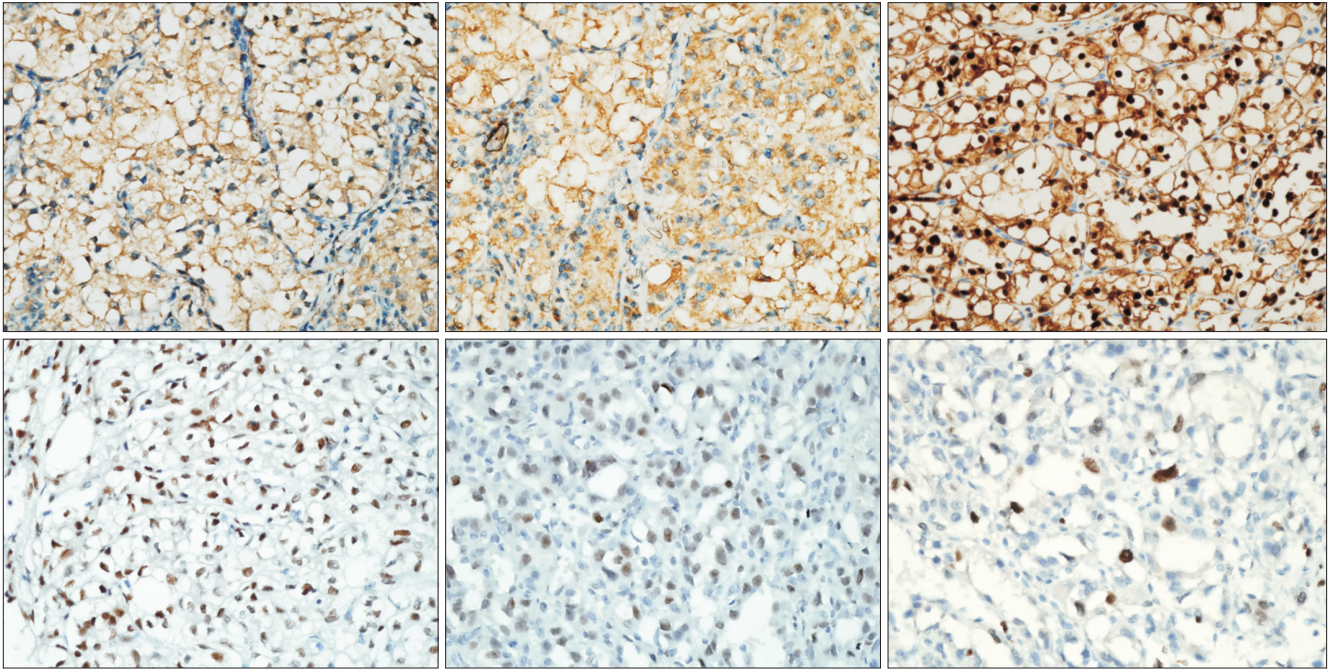

**Supplementary Fig. 4.** The representative expression of TRAF6, IRAK1, p-ERK, Survivin, c-Myc, and c-Fos (clockwise). TRAF6 and IRAK1 showed membranous/cytoplasmic pattern while p-ERK showed mixed membranous/cytoplasmic and nuclear pattern. Survivin, c-Myc, and c-Fos showed nuclear pattern (magnification,  $\times 400$ ).
