# Supplementary material for: IFITM3-mediated activation of TRAF6/MAPK/AP-1 pathways induces acquired TKI resistance in clear cell renal cell carcinoma
Source: PubMed Central journal article supplement — Investig Clin Urol. 2023 Dec 28;65(1):84–93. doi: 10.4111/icu.20230294 (PMC10789540; doi:10.4111/icu.20230294), 2023-12-28
Supplement: icu-65-84-s005.pdf [file icu-65-84-s005.pdf]

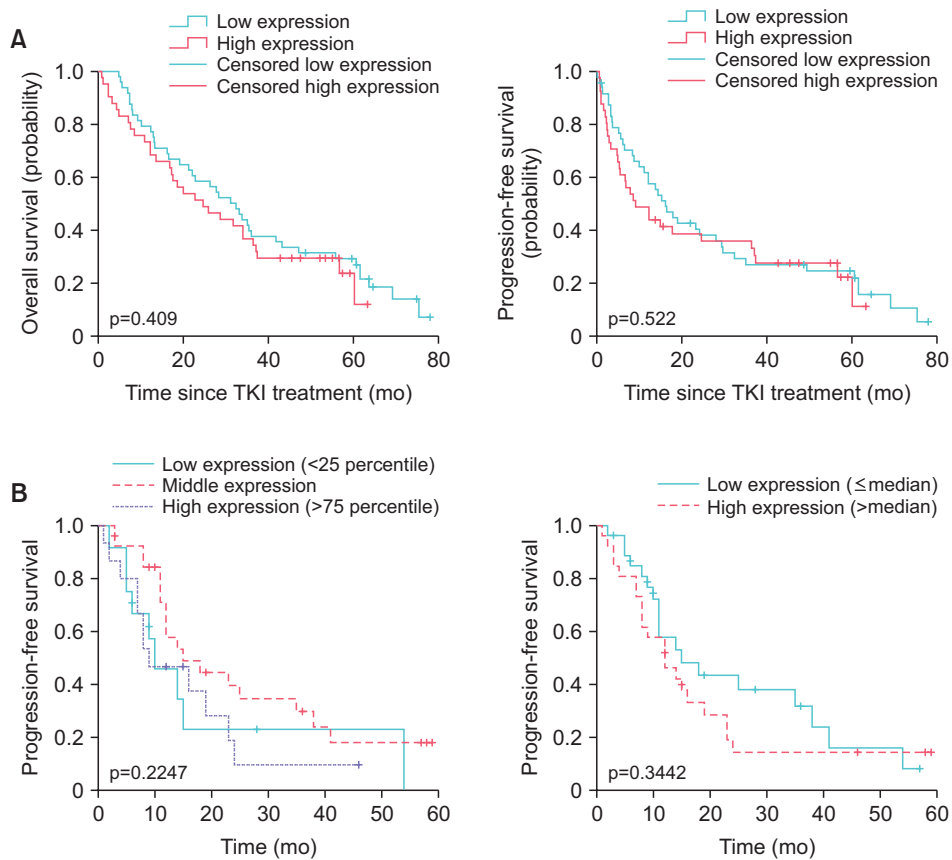

**Supplementary Fig. 5.** No correlation of interferon-induced transmembrane protein 3 (IFITM3) expression in intrinsic tyrosine kinase inhibitor (TKI) resistance. There was no prognostic significance of IFITM3 expression in the overall and progression-free survivals of 89 cases of advanced clear cell renal cell carcinoma (ccRCC) cohort (A), and in recurrence and progression-free survival of previously reported 53 ccRCC patients treated with sunitinib (B).
