# Supplementary material for: IFITM3-mediated activation of TRAF6/MAPK/AP-1 pathways induces acquired TKI resistance in clear cell renal cell carcinoma
Source: PubMed Central journal article supplement — Investig Clin Urol. 2023 Dec 28;65(1):84–93. doi: 10.4111/icu.20230294 (PMC10789540; doi:10.4111/icu.20230294), 2023-12-28
Supplement: icu-65-84-s006.pdf [file icu-65-84-s006.pdf]

**Supplementary Table 1.** IC values by sunitinib in various renal cell carcinoma cell lines

|                    | ACHN ( $\mu\text{M}$ ) | Caki-1 ( $\mu\text{M}$ ) | A-704 ( $\mu\text{M}$ ) | 769-P ( $\mu\text{M}$ ) | 786-O ( $\mu\text{M}$ ) |
|--------------------|------------------------|--------------------------|-------------------------|-------------------------|-------------------------|
| IC10               | 1.03                   | 1.02                     | 1.02                    | 1.02                    | 1.05                    |
| IC20               | 1.35                   | 1.16                     | 1.19                    | 1.20                    | 1.57                    |
| IC30               | 1.60                   | 1.27                     | 1.32                    | 1.33                    | 2.05                    |
| IC40               | 1.85                   | 1.37                     | 1.44                    | 1.45                    | 2.55                    |
| IC50               | 2.11                   | 1.47                     | 1.56                    | 1.57                    | 3.11                    |
| Final <sup>a</sup> | 2.50                   | 10.00                    | 10.00                   | 11.00                   | 17.00                   |

IC, inhibitory concentration.

<sup>a</sup>:Final concentration used to establish sunitinib-resistant renal cell carcinoma cell line.
